# Supplementary material for: Involvement of the Cellular Phosphatase DUSP1 in Vaccinia Virus Infection
Source: PubMed Central journal article supplement (PMC3828168; doi:10.1371/journal.ppat.1003719), 2013-11-14

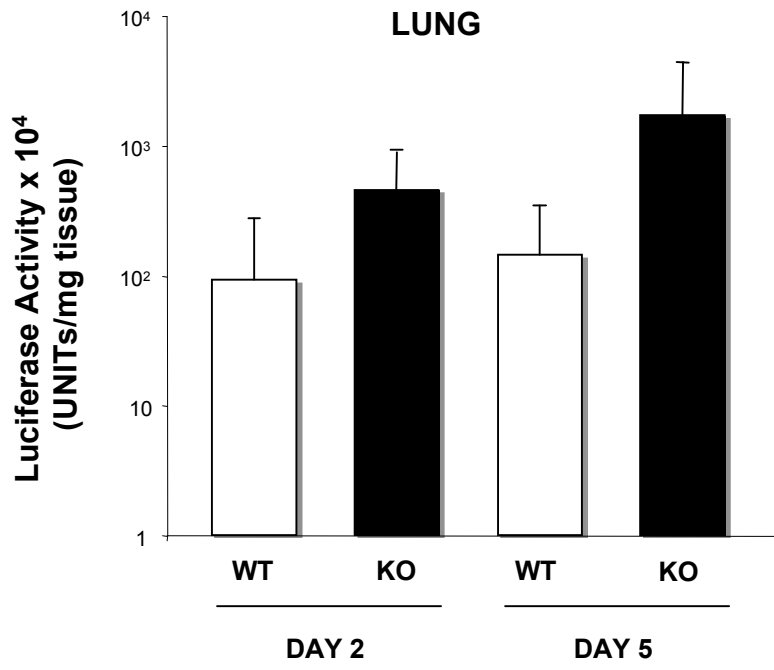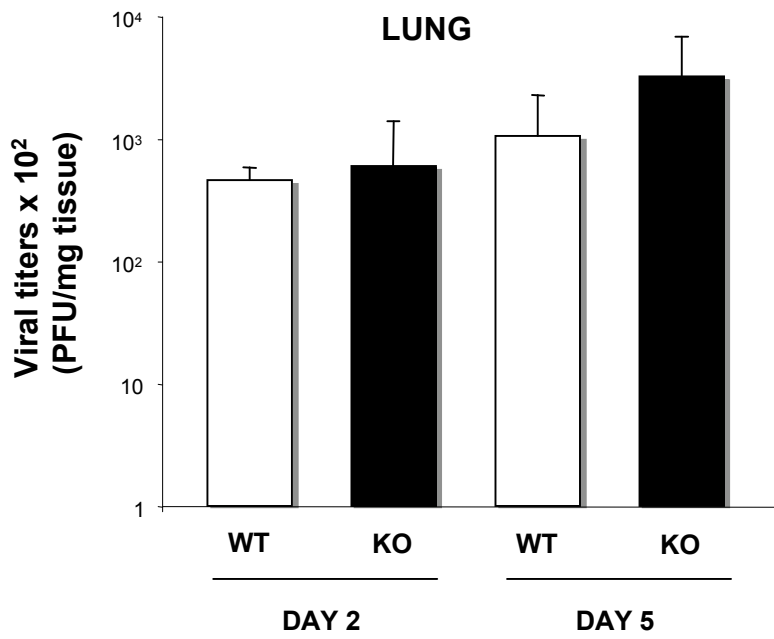

Supplement: ppat.1003719.s001.pdf [file ppat.1003719.s001.pdf]
