# Supplementary material for: Involvement of the Cellular Phosphatase DUSP1 in Vaccinia Virus Infection
Source: PubMed Central journal article supplement (PMC3828168; doi:10.1371/journal.ppat.1003719), 2013-11-14

**A****MVA-LUC**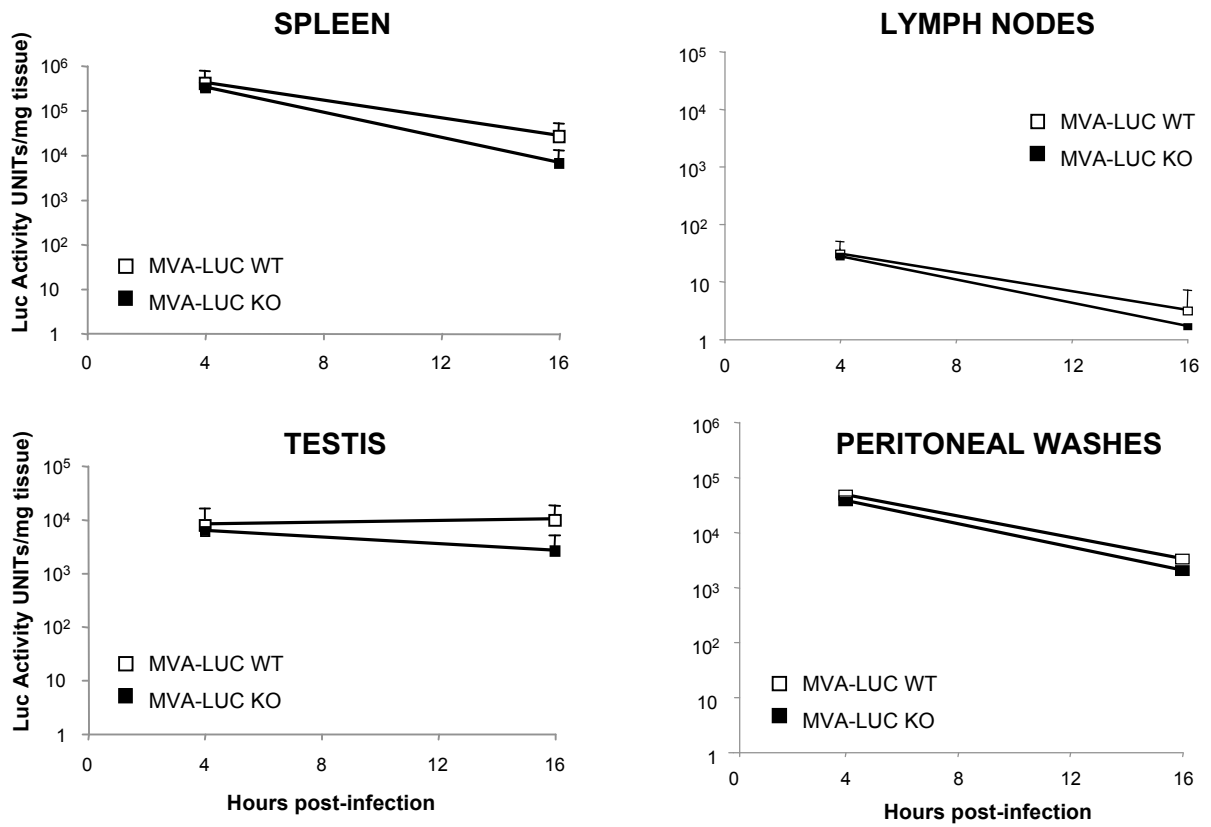**B****NYVAC-LUC**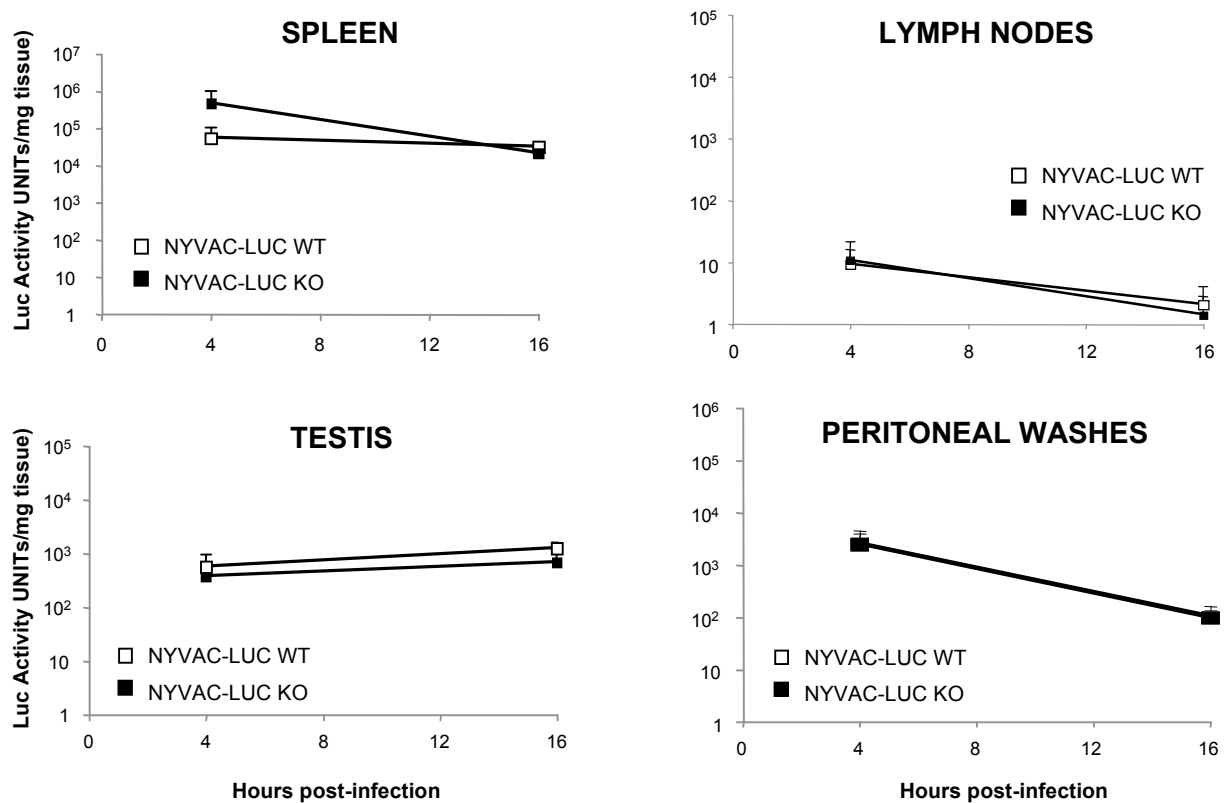

Supplement: ppat.1003719.s002.pdf [file ppat.1003719.s002.pdf]
